# Supplementary material for: Kinome-Wide RNA Interference Screening Identifies Mitogen-Activated Protein Kinases and Phosphatidylinositol Metabolism as Key Factors for Rabies Virus Infection
Source: PubMed Central journal article supplement (PMC6531879; doi:10.1128/msphere.00047-19), 2019-05-22

FRUCTOSE AND MANNOSE METABOLISM

● 18h only

● 18h and 36h

● 36h only

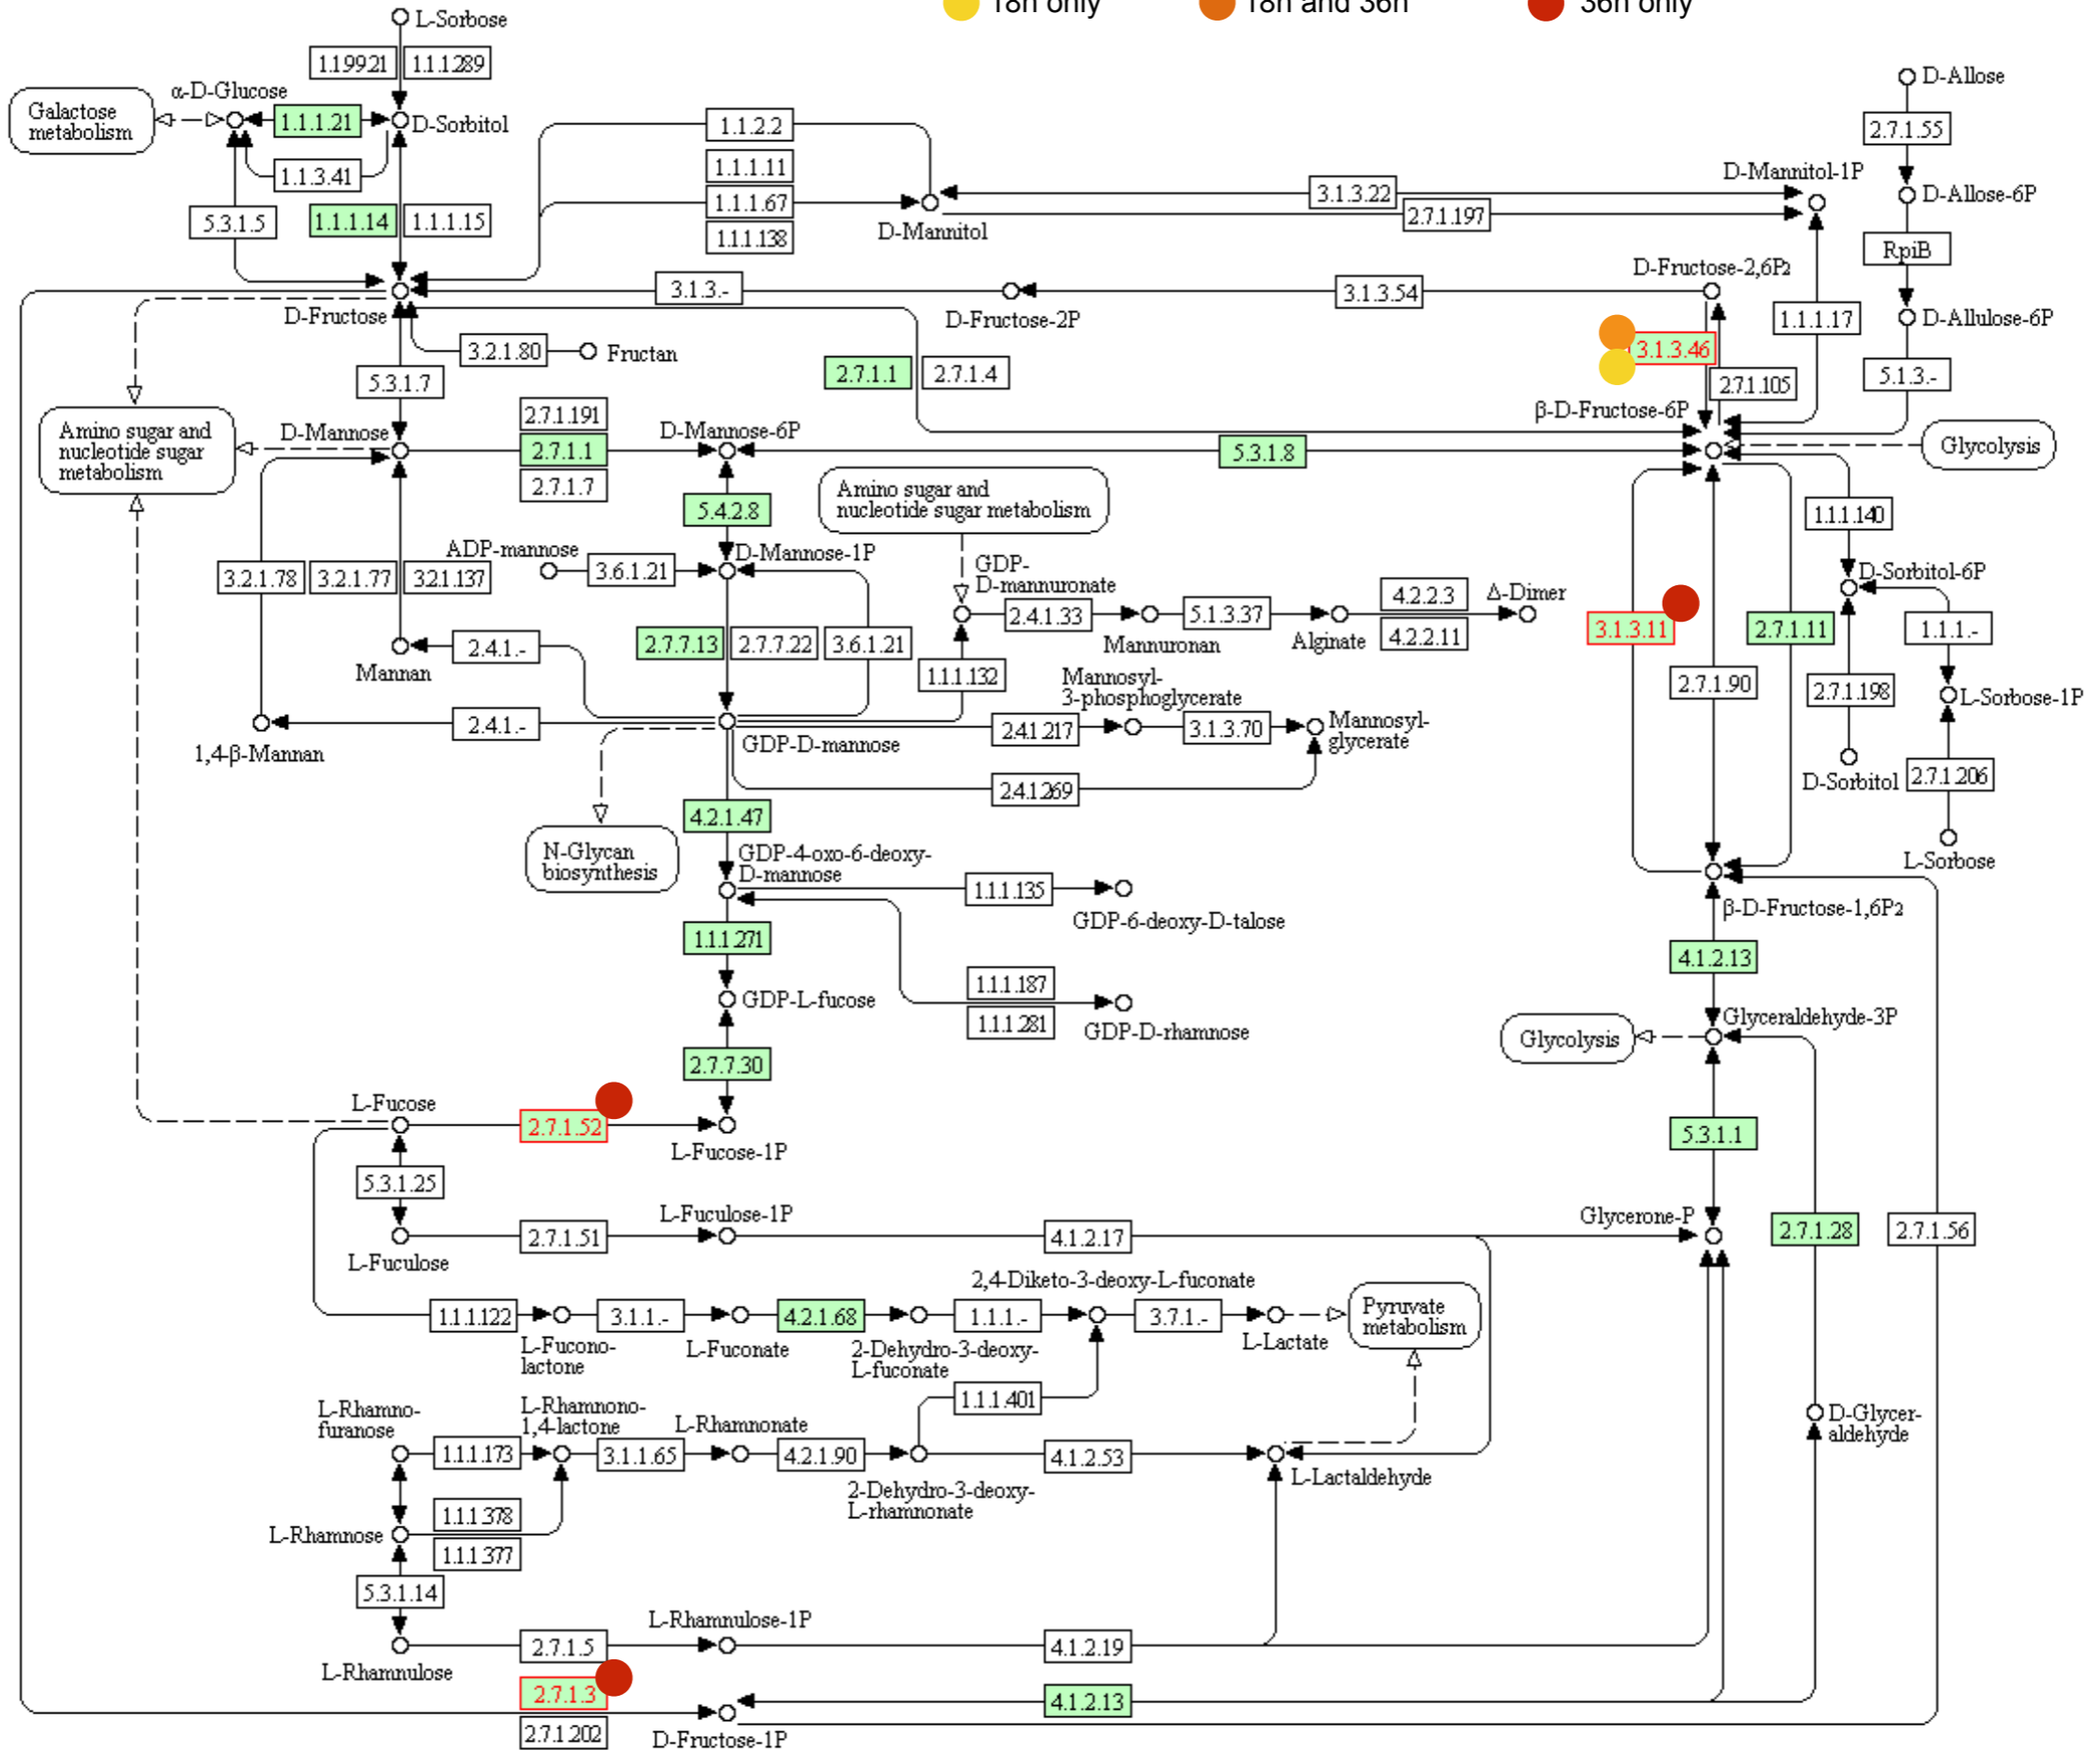

Supplement: mSphere.00047-19-sf004.pdf [file mSphere.00047-19-sf004.pdf]
